# Supplementary material
Source: publisher site journal article supplement (https://www.dovepress.com/article/442007)
Supplement: Supplementary file 1 [file get_supplementary_file.php]

**Table A1. Chinese version of Positive Affect and Negative Affect Schedule-Positive affect subscale (Chinese translation) (Qiu et al., 2008)**

| Positive affect items | Reference | Very Slightly or Not at All  (没有或非常轻微) | A Little  (有一点) | Moderately  (中等程度) | Quite a Bit  (很强烈) | Extremely  (非常强烈) |
| --- | --- | --- | --- | --- | --- | --- |
| Active  (活跃的) | (Watson et al., 1988) | 1 | 2 | 3 | 4 | 5 |
| Enthusiastic  (充满热情的) | (Watson et al., 1988) | 1 | 2 | 3 | 4 | 5 |
| Happy  (快乐的) | (Feldman Barrett & Russell, 1998) | 1 | 2 | 3 | 4 | 5 |
| Elated  (兴高采烈的) | (Feldman Barrett & Russell, 1998) | 1 | 2 | 3 | 4 | 5 |
| Excited  (兴奋的) | (Watson et al., 1988) | 1 | 2 | 3 | 4 | 5 |
| Proud  (自豪的) | (Watson et al., 1988) | 1 | 2 | 3 | 4 | 5 |
| Delighted  (欣喜的) | (Russell, 1980) | 1 | 2 | 3 | 4 | 5 |
| Energetic  (精神充沛的) | (Feldman Barrett & Russell, 1998) | 1 | 2 | 3 | 4 | 5 |
| Gratitude  (感激的) | (McCullough et al., 2004) | 1 | 2 | 3 | 4 | 5 |

**Table A2. Chinese version of Positive Affect and Negative Affect Schedule -Negative affect subscale (Chinese translation) (Qiu et al., 2008)**

| Negative affect items | Reference | Very Slightly or Not at All  (没有或非常轻微) | A Little  (有一点) | Moderately  (中等程度) | Quite a Bit  (很强烈) | Extremely  (非常强烈) |
| --- | --- | --- | --- | --- | --- | --- |
| Ashamed  (羞愧的) | (Watson et al., 1988) | 1 | 2 | 3 | 4 | 5 |
| Sad  (难过的) | (Feldman Barrett & Russell, 1998) | 1 | 2 | 3 | 4 | 5 |
| Afraid  (害怕的) | (Watson et al., 1988) | 1 | 2 | 3 | 4 | 5 |
| Nervous  (紧张的) | (Watson et al., 1988) | 1 | 2 | 3 | 4 | 5 |
| Scared  (惊恐的) | (Watson et al., 1988) | 1 | 2 | 3 | 4 | 5 |
| Guilty  (内疚的) | (Watson et al., 1988) | 1 | 2 | 3 | 4 | 5 |
| Irritable  (易怒的) | (Watson et al., 1988) | 1 | 2 | 3 | 4 | 5 |
| Jittery  (战战兢兢的) | (Watson et al., 1988) | 1 | 2 | 3 | 4 | 5 |
| Peeved  (恼怒的) | (McNair et al., 1971) | 1 | 2 | 3 | 4 | 5 |

References:

Feldman Barrett, L., & Russell, J. A. (1998). Independence and bipolarity in the structure of current affect. *Journal of Personality and Social Psychology*, *74*(4), 967-984.

McCullough, M. E., Tsang, J.-A., & Emmons, R. A. (2004). Gratitude in Intermediate Affective Terrain: Links of Grateful Moods to Individual Differences and Daily Emotional Experience. *Journal of Personality and Social Psychology*, *86*(2), 295-309.

McNair, D. M., Lorr, M., & Droppleman, L. (1971). *Profiles of mood states*. Educational and Industrial Testing Services.

Qiu, L., Zheng, X., & Wang, Y. (2008). Revision of the positive affect and negative affect scale. *Chinese Journal of Applied Psychology*, *14*(3), 249-254.

Russell, J. A. (1980). A circumplex model of affect. *Journal of Personality and Social Psychology*, *39*(6), 1161-1178.

Watson, D., Clark, L. A., & Tellegen, A. (1988). Development and validation of brief measures of positive and negative affect: The PANAS scales. *Journal of Personality and Social Psychology*, *54*(6), 1063-1070.
